# Supplementary material for: Cyclopentadithiophene-benzothiadiazole oligomers and polymers; synthesis, characterisation, field-effect transistor and photovoltaic characteristics
Source: Royal Society of Chemistry journal article supplement (doi:10.1039/c1jm12449h), 2011-11-03
Supplement: c1jm12449h.pdf [file c1jm12449h.pdf]

# Supplementary Information for

## Cyclopentadithiophene-Benzothiadiazole Oligomers and Polymers; 5 Synthesis, Characterisation, Field-Effect Transistor and Photovoltaic Characteristics

M. Horie,<sup>a,c,\*</sup> J. Kettle,<sup>b,c</sup> C.-Y. Yu,<sup>d,c</sup> L. A. Majewski,<sup>e,d</sup> S.-W. Chang,<sup>a</sup> J. Kirkpatrick,<sup>f</sup> S. M. Tuladhar,<sup>g</sup>  
J. Nelson,<sup>g</sup> B. R. Saunders<sup>h</sup> and M. L. Turner<sup>c,\*</sup>

<sup>10</sup> <sup>a</sup> Frontier Research Center on Fundamental and Applied Sciences of Matters, Department of Chemical Engineering,  
National Tsing-Hua University, 101, Sec. 2, Kuang-Fu Road, Hsin-Chu, 30013 Taiwan

<sup>b</sup> School of Electronic Engineering, Bangor University, Dean st., Bangor, Gwynedd, LL57 1UT, Wales, UK.

<sup>c</sup> Organic Materials Innovation Centre, School of Chemistry, University of Manchester, Oxford Road, Manchester, M13  
9PL, UK.

<sup>15</sup> <sup>d</sup> Department of Materials Science and Engineering, National Taiwan University of Science and Technology, 43, Section 4,  
Keelung Road, Taipei, Taiwan, 106

<sup>e</sup> School of Electrical and Electronic Engineering, University of Manchester, Manchester, M60 1QD, UK

<sup>f</sup> Oxford Martin School, University of Oxford, UK

<sup>g</sup> Department of Physics, Imperial College, London, UK.

<sup>20</sup> <sup>h</sup> School of Materials, University of Manchester, Grosvenor St, Manchester, M1 7HS, UK.

### Correspondence Address

Dr. Masaki Horie

<sup>25</sup> Frontier Research Center on Fundamental and Applied Sciences of Matters

Department of Chemical Engineering, National Tsing-Hua University

101, Sec. 2, Kuang-Fu Road, Hsin-Chu, 30013 Taiwan

E-mail: mhorie@mx.nthu.edu.tw

<sup>30</sup> Professor Michael L. Turner

Organic Materials Innovation Centre, School of Chemistry, University of Manchester

Oxford Road, Manchester, M13 9PL, UK

E-mail: michael.turner@manchester.ac.uk

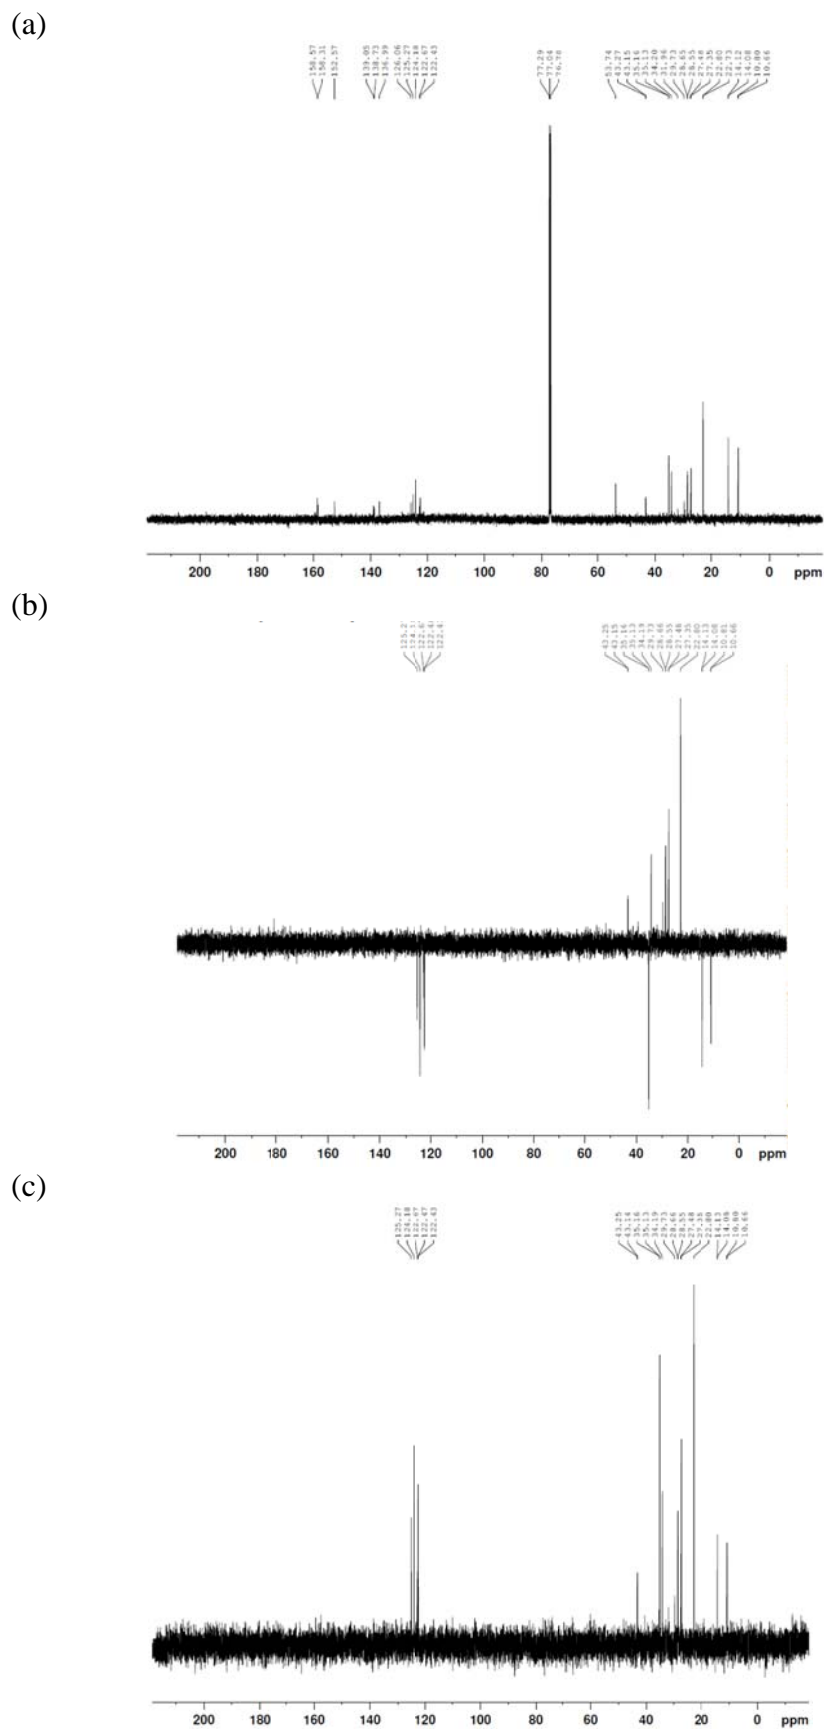

5

**Figure SI1.** (a)  $^{13}\text{C}$  NMR, (b) DEPT (135 degrees) and (c) DEPT (90 degrees) spectra of oligomer 1.

(a)

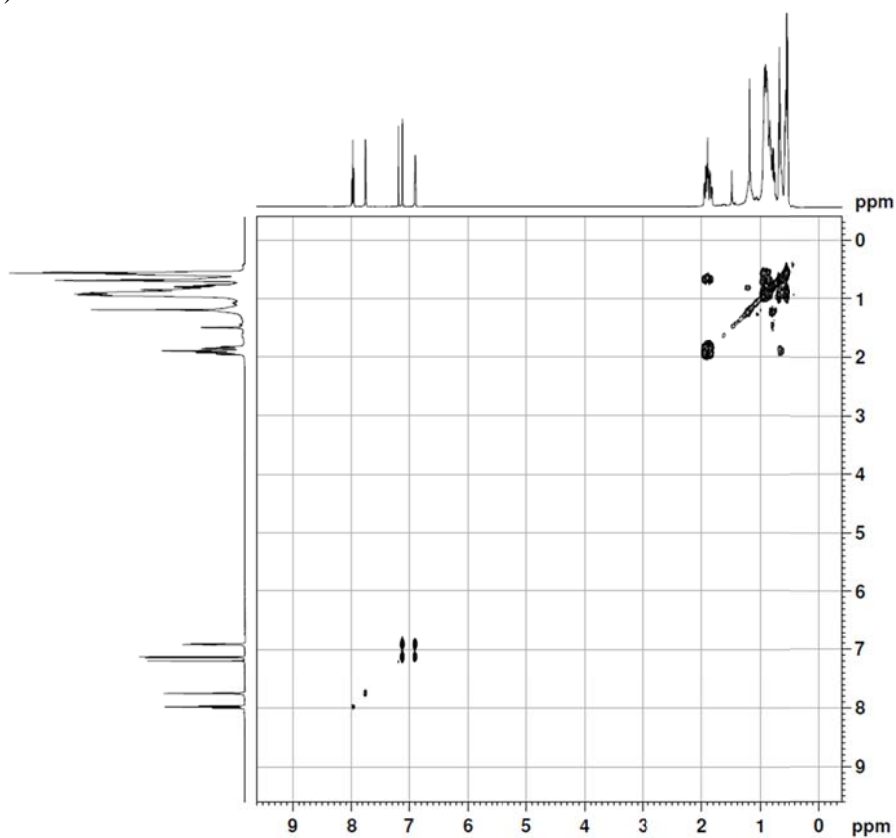

(b)

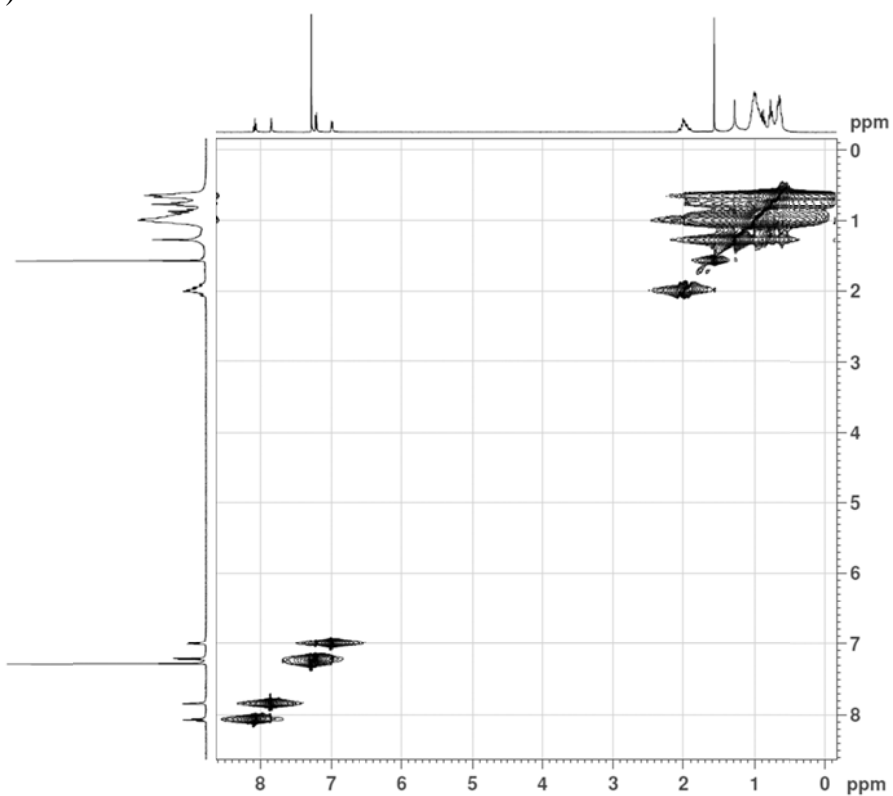

5 **Figure SI2.** (a) <sup>1</sup>H-<sup>1</sup>H COSY and (b) <sup>1</sup>H-<sup>1</sup>H NOESY spectra of oligomer **1**.

(a)

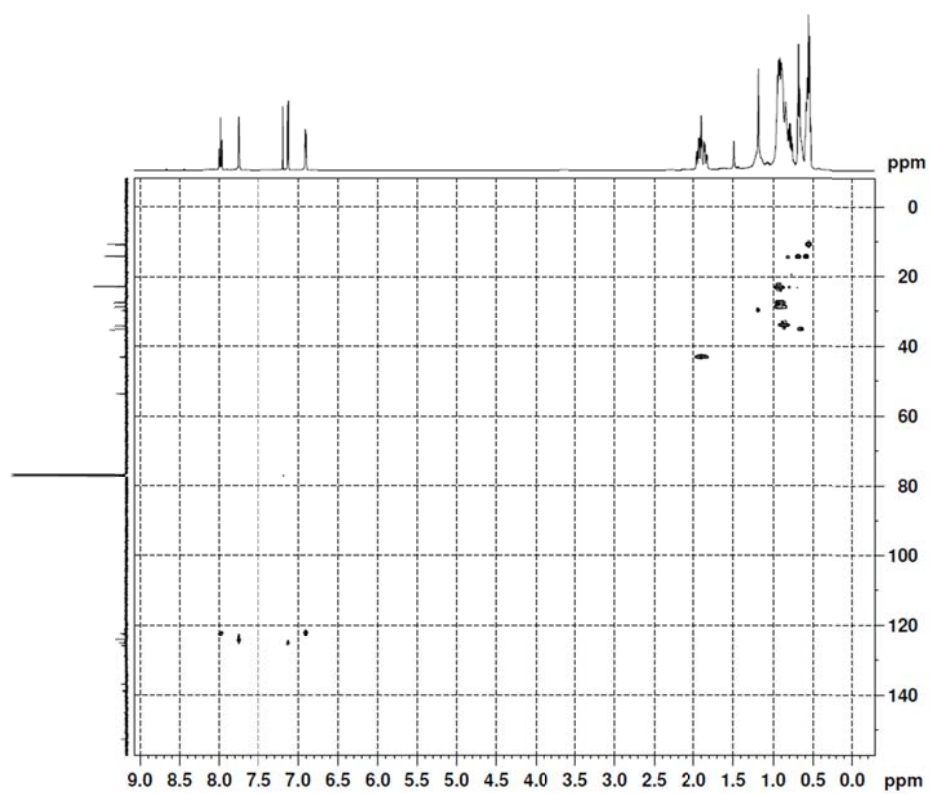

(b)

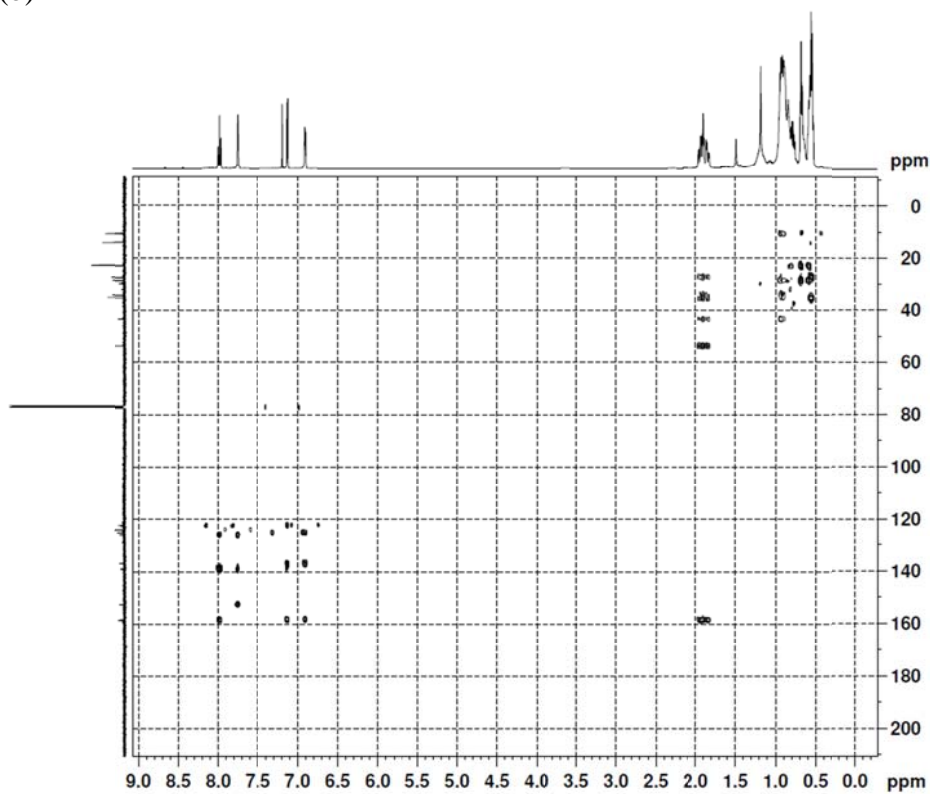

5

**Figure SI3.** (a) HMQC and (b) HMBC spectra of oligomer **1**.

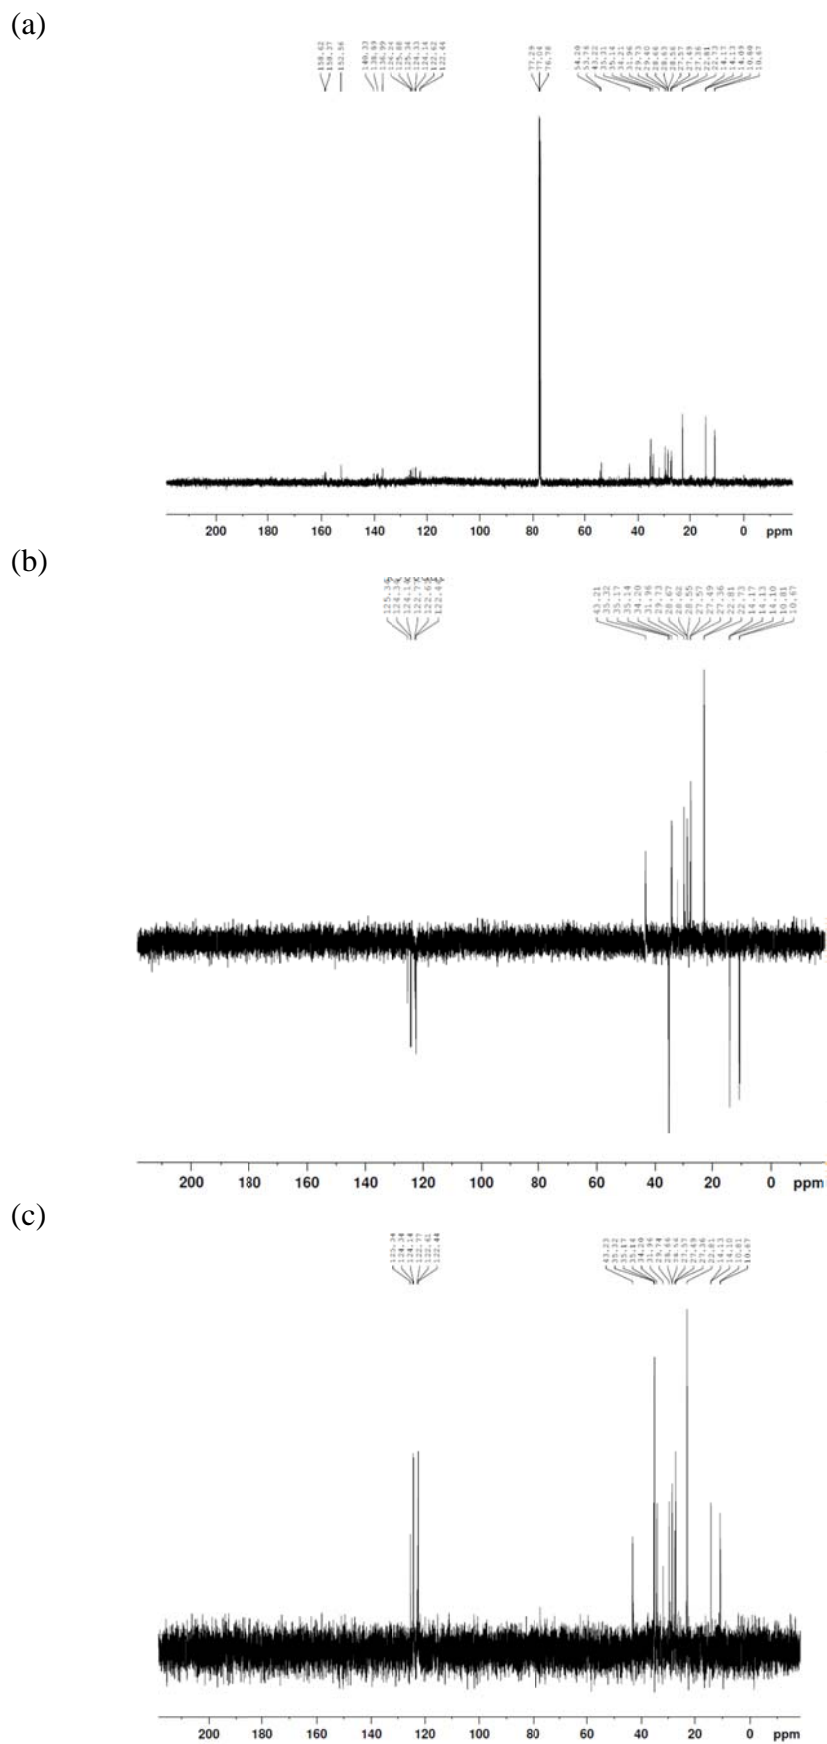

5

**Figure SI4.** (a)  $^{13}\text{C}$  NMR, (b) DEPT (135 degrees) and (c) DEPT (90 degrees) spectra of oligomer **2**.

(a)

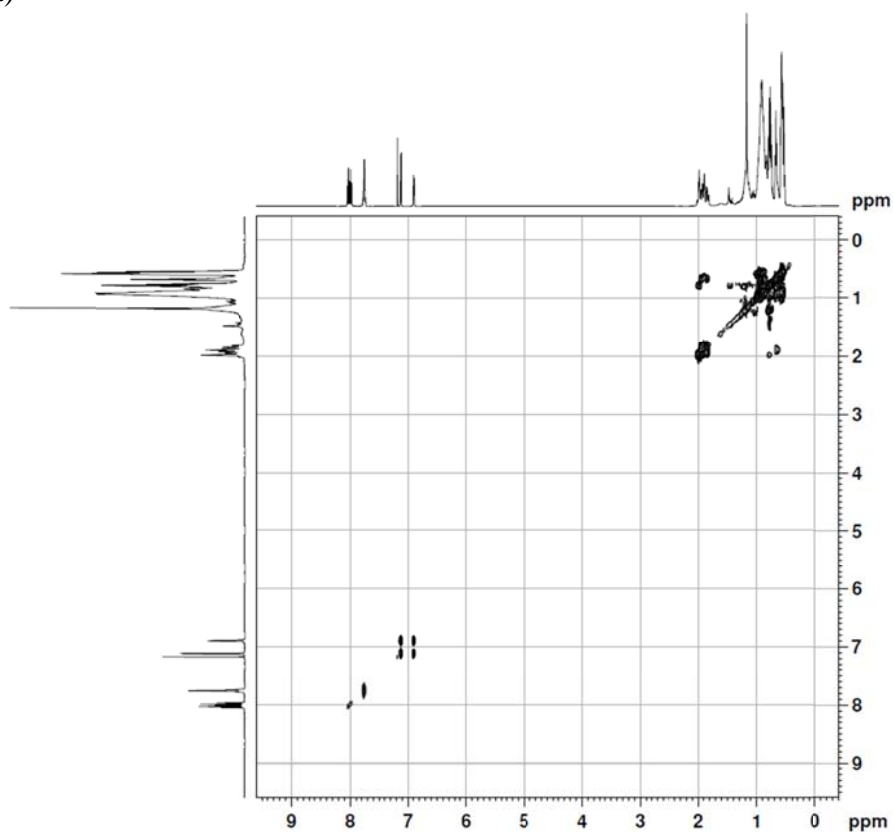

(b)

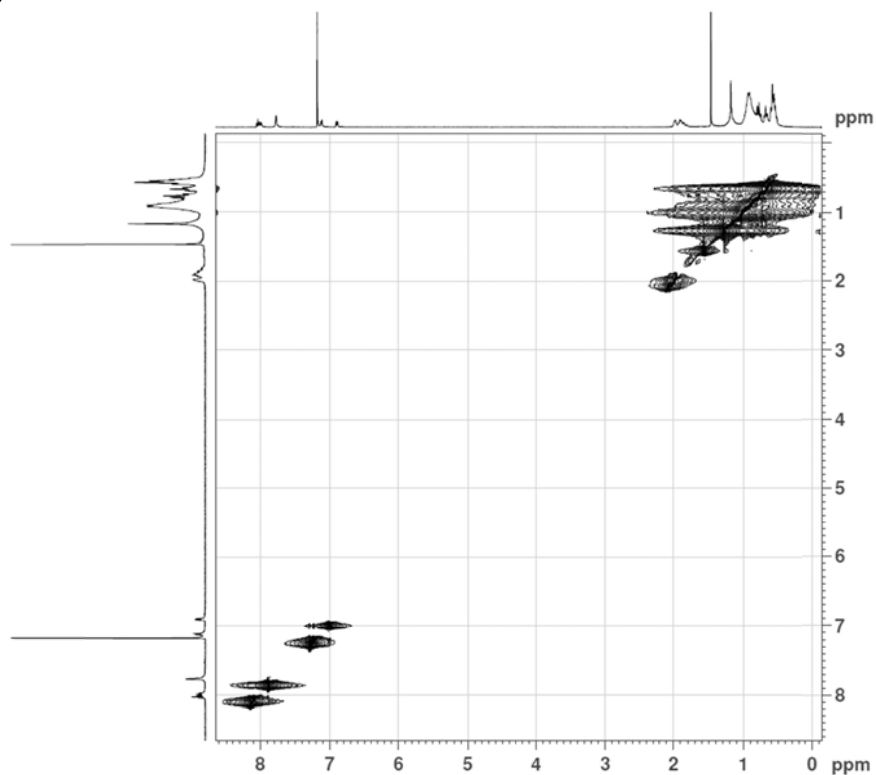

Figure SI5. (a) <sup>1</sup>H-<sup>1</sup>H COSY and (b) <sup>1</sup>H-<sup>1</sup>H NOESY spectra of oligomer 2.

(a)

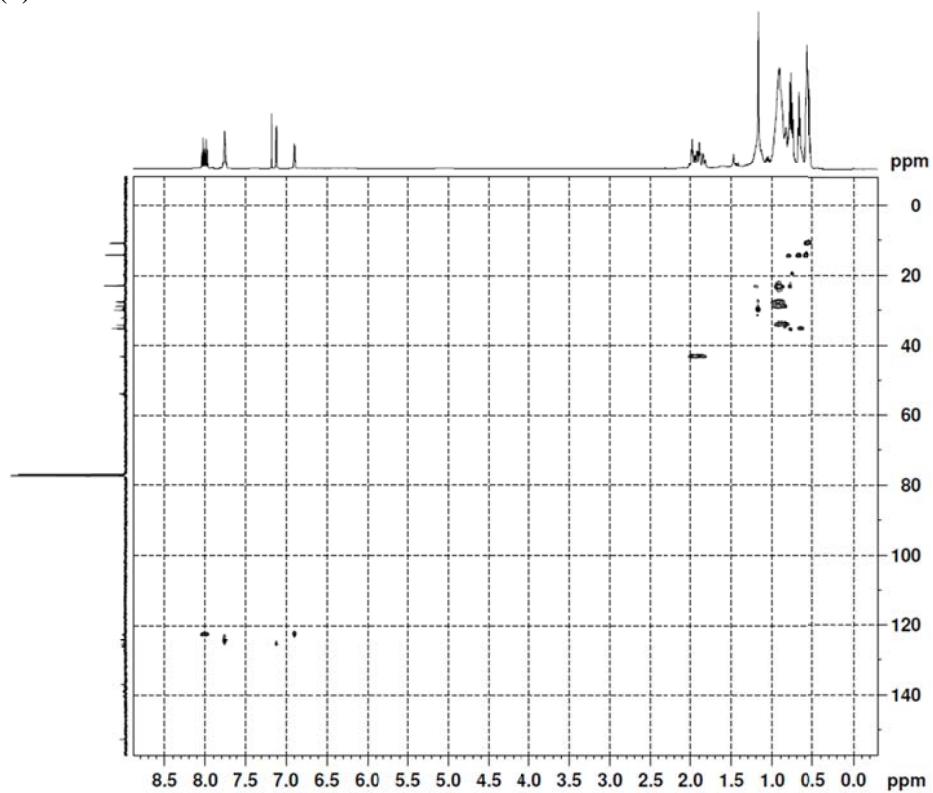

(b)

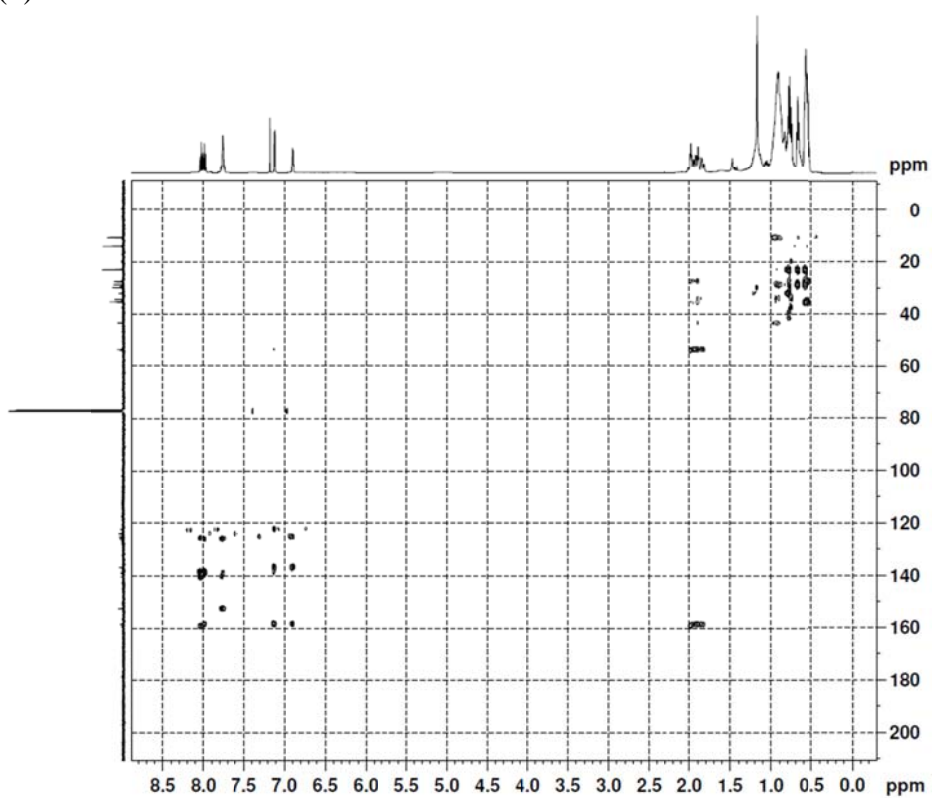

5

**Figure SI6.** (a) HMQC and (g) HMBC spectra of oligomer 2.

(a)

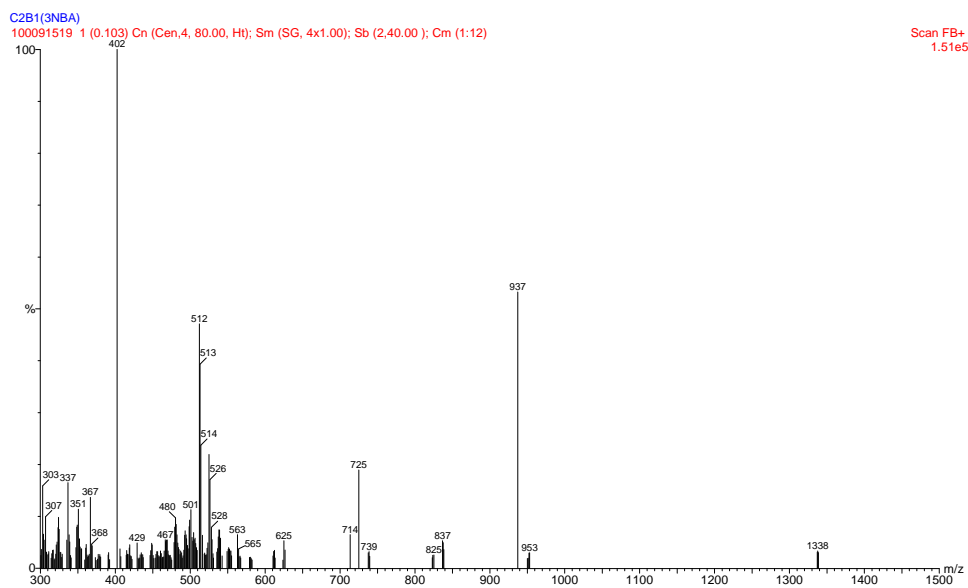

5

(b)

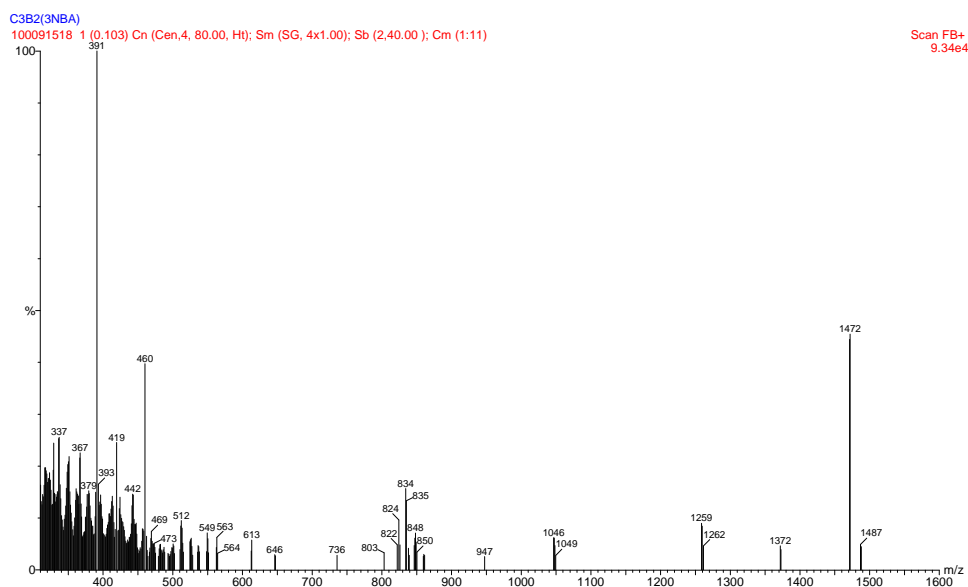

10

**Figure SI7.** FABMS spectra of (a) **1** ( $m/z = 937 [M]^+$ ) and (b) **2** ( $m/z = 1472 [M]^+$ ) in the presence of nitrobenzyl alcohol as matrix.
